# Supplementary material for: Microwave-Assisted Extraction of Carrageenan from Sarcopeltis skottsbergii
Source: MDPI journal article supplement (doi:10.3390/md21020083), 2023-01-25
Supplement: s1 [file s1]

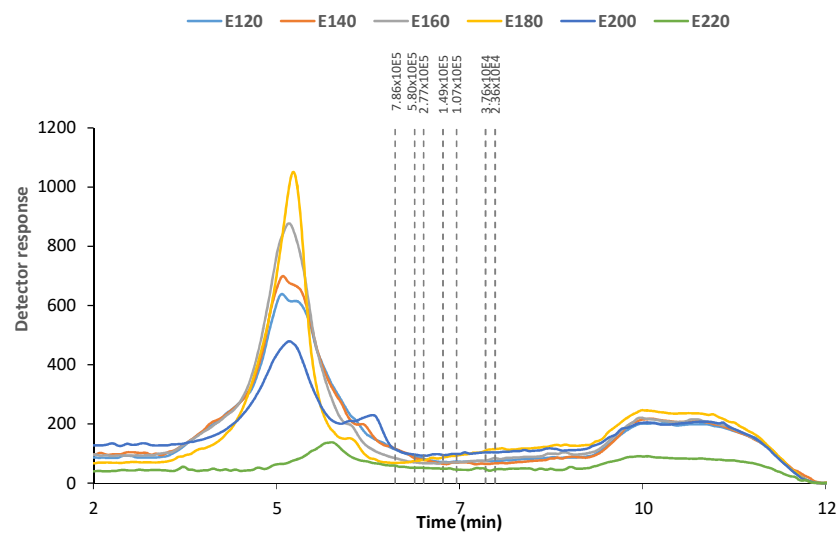

**Figure S1.** Influence of hydrothermal treatment temperature on the GPC profiles of *Sarcopeltis skottsbergii* crude extracts.

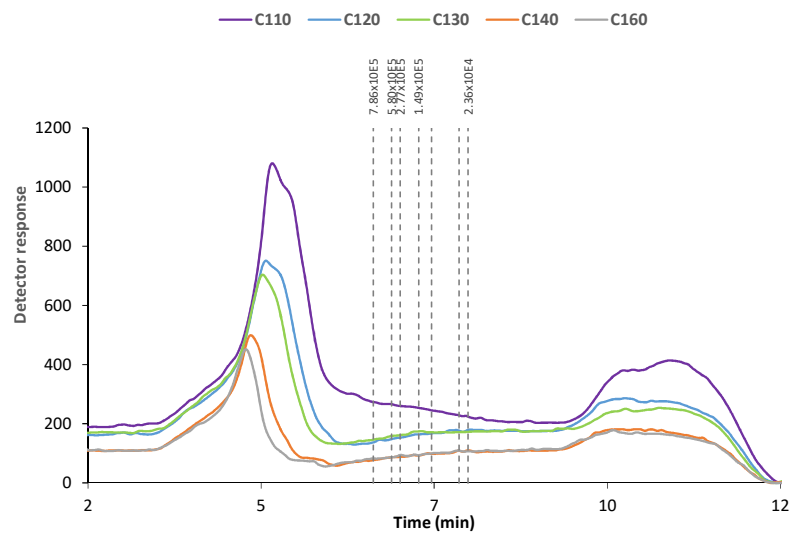

**Figure S2.** Influence of hydrothermal treatment temperature on the GPC profiles of *Sarcopeltis skottsbergii* isolated carrageenan.

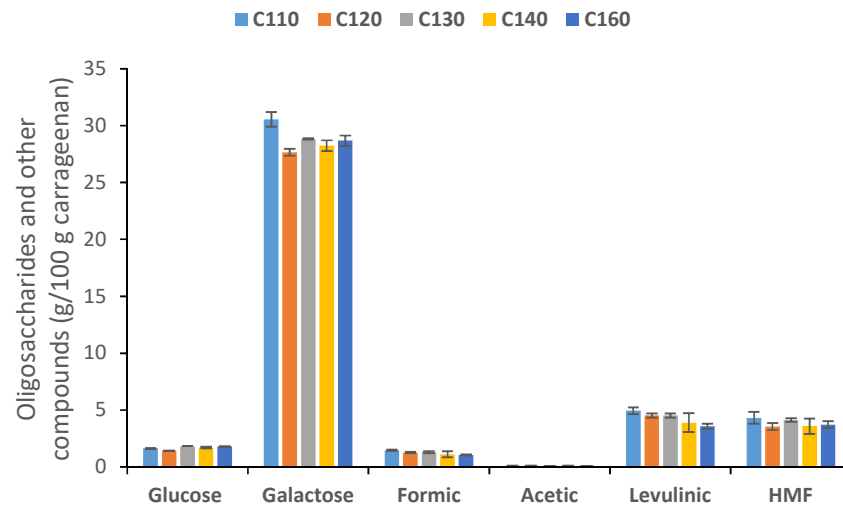

**Figure S3.** Influence of hydrothermal treatment temperature on the composition of crude carrageenan.
